# Supplementary material for: Deep eutectic solvents as attractive media for CO2 capture
Source: Royal Society of Chemistry journal article supplement (doi:10.1039/c5gc02319j), 2016-01-01
Supplement: c5gc02319j1.pdf [file c5gc02319j1.pdf]

*Electronic Supplementary Information*

*for*

**Deep Eutectic Solvents as Attractive Media for CO<sub>2</sub> Capture**

Tushar J. Trivedi, Ji Hoon Lee, Hyeon Jeong Lee, You Kyeong Jeong, and Jang Wook Choi\*

Graduate School of Energy, Environmental Water and Sustainability (EEWS) and Saudi  
Aramco-KAIST CO<sub>2</sub> Management Center, Korea Advanced Institute of Science and Technology  
(KAIST), 291 Daehak-ro, Yuseong-gu, Daejeon 305-701, Republic of Korea

## Spectroscopic characterization of deep eutectic solvents (DESs)

### Pure [MEA.Cl][EDA]

$^1\text{H}$  NMR (400 MHz,  $\text{D}_2\text{O}$ , 25 °C):  $\delta_{\text{H}}$  (ppm) 5.2 (*s*, -OH, broad), 3.45 (*t*, -HO- $\text{CH}_2$ ), 2.60 (*t*, - $\text{CH}_2\text{-NH}_3^+$ ), 2.57 (*s*, sharp - $\text{CH}_2$  of EDA);  $^{13}\text{C}$  NMR (400 MHz,  $\text{D}_2\text{O}$ , 25 °C):  $\delta_{\text{C}}$  (ppm): 60.98, 41.87, and 40.85; FTIR: (neat)  $\nu_{\text{max}}$  = 839, 948, 1073, 1318, 1460, 1513, 1600, 2139, 2868, 2900, 3338  $\text{cm}^{-1}$ ; ESI MS: (ESI<sup>+</sup>) *m/z*-61.11 [MEAH]<sup>+</sup>, (ESI<sup>-</sup>) *m/z*-255.26 [Cl(EDA)<sub>3</sub>]<sup>-</sup>

### [MEA.Cl][EDA] after CO<sub>2</sub> absorption:

$^1\text{H}$  NMR (400 MHz,  $\text{D}_2\text{O}$ , 25 °C):  $\delta_{\text{H}}$  (ppm) 6.51 (*s*, -NH), 5.26 (*s*, -OH, broad), 3.55 (*t*, -HO- $\text{CH}_2$ ), 3.06 (*t*, - $\text{CH}_2\text{-NHCOO}$ ), 2.846 (*m*, - $\text{CH}_2\text{-NH}_3^+$  and - $\text{CH}_2\text{-NH}$ ), 2.74 (*s*, sharp - $\text{CH}_2$  of EDA and - $\text{NH}_2\text{-NH}$ ),  $^{13}\text{C}$  NMR (400 MHz,  $\text{D}_2\text{O}$ , 25 °C):  $\delta_{\text{C}}$  (ppm) 164.37, 58.20, 41.25, 40.194 and 38.95; FTIR: (neat)  $\nu_{\text{max}}$  = 851, 1015, 1098, 1190, 1320, 1487, 1513, 1600, 2134, 3056, 3342  $\text{cm}^{-1}$ ; ESI MS: (ESI<sup>+</sup>) *m/z*-61.11 [MEAH]<sup>+</sup>, (ESI<sup>-</sup>) *m/z*-283.26 [Cl(EDA)<sub>3</sub>CO<sub>2</sub>]<sup>-</sup>

### Pure [TEA.Cl][EDA]

$^1\text{H}$  NMR (400 MHz,  $\text{D}_2\text{O}$ , 25 °C):  $\delta_{\text{H}}$  (ppm) 3.69 (*t*, -HO- $\text{CH}_2$ -), 2.64 (*t*, -( $\text{CH}_2$ )<sub>3</sub>- $\text{NH}^+$ ), 2.55 (*s*, sharp - $\text{CH}_2$  of EDA);  $^{13}\text{C}$  NMR (400 MHz,  $\text{D}_2\text{O}$ , 25 °C):  $\delta_{\text{C}}$  (ppm): 61.31, 58.21, 44.35; ESI MS: (ESI<sup>+</sup>) *m/z*-150.20 [TEAH]<sup>+</sup>, (ESI<sup>-</sup>) *m/z*-255.23 [Cl(EDA)<sub>3</sub>]<sup>-</sup>

### [TEA.Cl][EDA] after CO<sub>2</sub> absorption

$^1\text{H}$  NMR (400 MHz,  $\text{D}_2\text{O}$ , 25 °C):  $\delta_{\text{H}}$  (ppm) 3.484 (*t*, -HO- $\text{CH}_2$ ), 3.071 (*t*, -( $\text{CH}_2$ )<sub>3</sub>- $\text{NH}^+$ ), 2.819 (*t*, - $\text{NH}_2\text{-CH}_2$ ), 2.747 (*s*, sharp - $\text{CH}_2$  of EDA and - $\text{NH}_2\text{-NH}$ ), 2.57 (*t*, - $\text{CH}_2\text{-NHCOO}$ );  $^{13}\text{C}$  NMR (400 MHz,  $\text{D}_2\text{O}$ , 25 °C):  $\delta_{\text{C}}$  (ppm) 166.97, 60.97, 58.04, 42.77, 42.28, 41.55; ESI MS: (ESI<sup>+</sup>) *m/z*-150.12 [TEAH]<sup>+</sup>, (ESI<sup>-</sup>) *m/z*-283.26 [Cl(EDA)<sub>3</sub>CO<sub>2</sub>]<sup>-</sup>

### Pure [UE.Cl][EDA]

$^1\text{H}$  NMR (400 MHz,  $\text{D}_2\text{O}$ , 25 °C):  $\delta_{\text{H}}$  (ppm) 2.68 (*s*, sharp - $\text{CH}_2$  of EDA);  $^{13}\text{C}$  NMR (400 MHz,  $\text{D}_2\text{O}$ , 25 °C):  $\delta_{\text{C}}$  (ppm): 162.48, 42.67; ESI MS: (ESI<sup>+</sup>) *m/z*-61.09 [UEH]<sup>+</sup>, (ESI<sup>-</sup>) *m/z*-255.23 [Cl(EDA)<sub>3</sub>]<sup>-</sup>

### **[UE.Cl][EDA] after CO<sub>2</sub> absorption**

<sup>1</sup>H NMR (400 MHz, D<sub>2</sub>O, 25 °C): δ<sub>H</sub> (ppm) 3.027 (*t*, -CH<sub>2</sub>-NHCOO), 2.68 (*m*, -CH<sub>2</sub>-NH<sub>2</sub> and sharp -CH<sub>2</sub> of EDA); <sup>13</sup>C NMR (400 MHz, D<sub>2</sub>O, 25 °C): δ<sub>C</sub> (ppm) 164.46, 161.45, 40.37, 40.24, 40.04; ESI MS: (ESI<sup>+</sup>) *m/z*-61.11 [UEH]<sup>+</sup>, (ESI<sup>-</sup>) *m/z*-283.26 [Cl(EDA)<sub>3</sub>CO<sub>2</sub>]<sup>-</sup>

### **Pure [TAE.Cl][EDA]**

<sup>1</sup>H NMR (400 MHz, D<sub>2</sub>O, 25 °C): δ<sub>H</sub> (ppm) 2.712 (*s*, sharp -CH<sub>2</sub> of EDA), 0.92 (*s*, -CH<sub>3</sub>); <sup>13</sup>C NMR (400 MHz, D<sub>2</sub>O, 25 °C): δ<sub>C</sub> (ppm): 70.88, 41.02, 18.45; ESI MS: (ESI<sup>+</sup>) *m/z*-76.18 [TAEH]<sup>+</sup>, (ESI<sup>-</sup>) *m/z*-255.23 [Cl(EDA)<sub>3</sub>]<sup>-</sup>

### **[TAE.Cl][EDA] after CO<sub>2</sub> absorption:**

<sup>1</sup>H NMR (400 MHz, D<sub>2</sub>O, 25 °C): δ<sub>H</sub> (ppm) 3.09 (*t*, -CH<sub>2</sub>NHCOO), 2.78 (*t*, -CH<sub>2</sub>-NH<sub>2</sub>), 2.72 (*s*, sharp -CH<sub>2</sub> of EDA and -NH<sub>2</sub>/-NH), 1.02 (*s*, -CH<sub>3</sub>); <sup>13</sup>C NMR (400 MHz, D<sub>2</sub>O, 25 °C): δ<sub>C</sub> (ppm) 164.36, 109.88, 40.21, 39.76, 39.13; ESI MS: (ESI<sup>+</sup>) *m/z*-76.20 [TAEH]<sup>+</sup>, (ESI<sup>-</sup>) *m/z*-283.26 [Cl(EDA)<sub>3</sub>CO<sub>2</sub>]<sup>-</sup>

### **Heat of Absorption Calculation:**

The heat of absorption was calculated based on Van't Hoff equation. For this, equilibrium constants were attained from CO<sub>2</sub> uptakes at series of temperatures.<sup>1, 2</sup> For the general reaction scheme below,

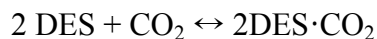

Equilibrium constant can be defined as follows:

$$K = \frac{[\text{2DES}\cdot\text{CO}_2]}{[\text{DES}]^2 P_{\text{CO}_2}}$$

As all our experiments were carried out at atmospheric pressure, we assume  $P_{\text{CO}_2} = 1$ .  $K$  value at each temperature was then obtained by [DES] and [2DES-CO<sub>2</sub>]. The  $K$  value can be incorporated

with Van't Hoff equation below, from which  $\Delta H$  can be retrieved from the linear fitting over  $\ln(K)$  vs.  $1/T$  plot.

$$\Delta G = \Delta H - T\Delta S$$

$$-RT \ln(K) = \Delta H - T\Delta S$$

$$\ln(K) = -\frac{\Delta H}{RT} + \frac{\Delta S}{R}$$

$$\ln(K) = -\frac{\Delta H}{R} \left(\frac{1}{T}\right) + C$$

### **Corrosion Test:**

To measure the corrosiveness of the synthesized DESs and also compare it with that of conventional amine based scrubbing solvents (MEA and EDA), so-called the weight loss technique was employed. In this experiment, a stainless steel piece ( $\sim 1.75 \times 1.15 \text{ cm}^2$ ) was immersed in a vial (5 mL) containing each of highly concentrated (75 wt%) solvent loaded with 20 wt%  $\text{CO}_2$  at 90 °C for 10 days. To maintain the constant temperature, an oil bath was used. Before and after the immersion, the weight of each piece was measured. Based on the weight difference, the corrosion penetration rate (CPR) in millimeter per year (mm/y) was calculated using the following formula.<sup>3</sup>

$$\text{Corrosion penetration rate (CPR)} = \frac{KW}{\rho At}$$

where  $K$  = rate constant ( $8.76 \times 10^4$ ),  $W$  = weight loss in g,  $\rho$  = density of stainless steel in  $\text{g/cm}^3$ ,  $t$  = time of exposure in hours,  $A$  = exposed specimen area ( $\text{cm}^2$ ).

## Corrosion process

Corrosion is a coupled redox process at an interface of steel surface and corrosive solution (MEA, EDA, and DESs in the current study). The oxidation occurs at the anode via iron dissolution, while the reduction takes place in the solution. The corrosion rate tends to increase with increasing CO<sub>2</sub> loading in the presence of moisture due to the process below producing carbonic acid (H<sub>2</sub>CO<sub>3</sub>) and bicarbonate (HCO<sub>3</sub><sup>-</sup>) which can be redox coupled with iron:<sup>3,4</sup>

Absorption of CO<sub>2</sub>:

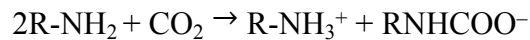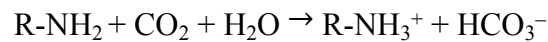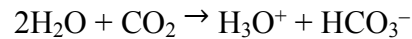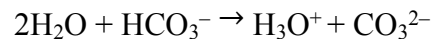

At the steel surface (oxidation):

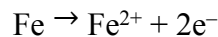

In the solution (reduction):

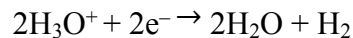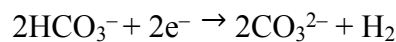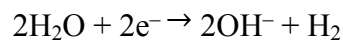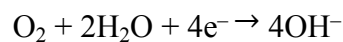

Formation of corrosion products:

Ferrous hydroxide:  $\text{Fe}^{2+} + 2\text{OH}^- \rightarrow \text{Fe}(\text{OH})_2$

Ferrous carbonate:  $\text{Fe}^{2+} + \text{CO}_3^{2-} \rightarrow \text{FeCO}_3$

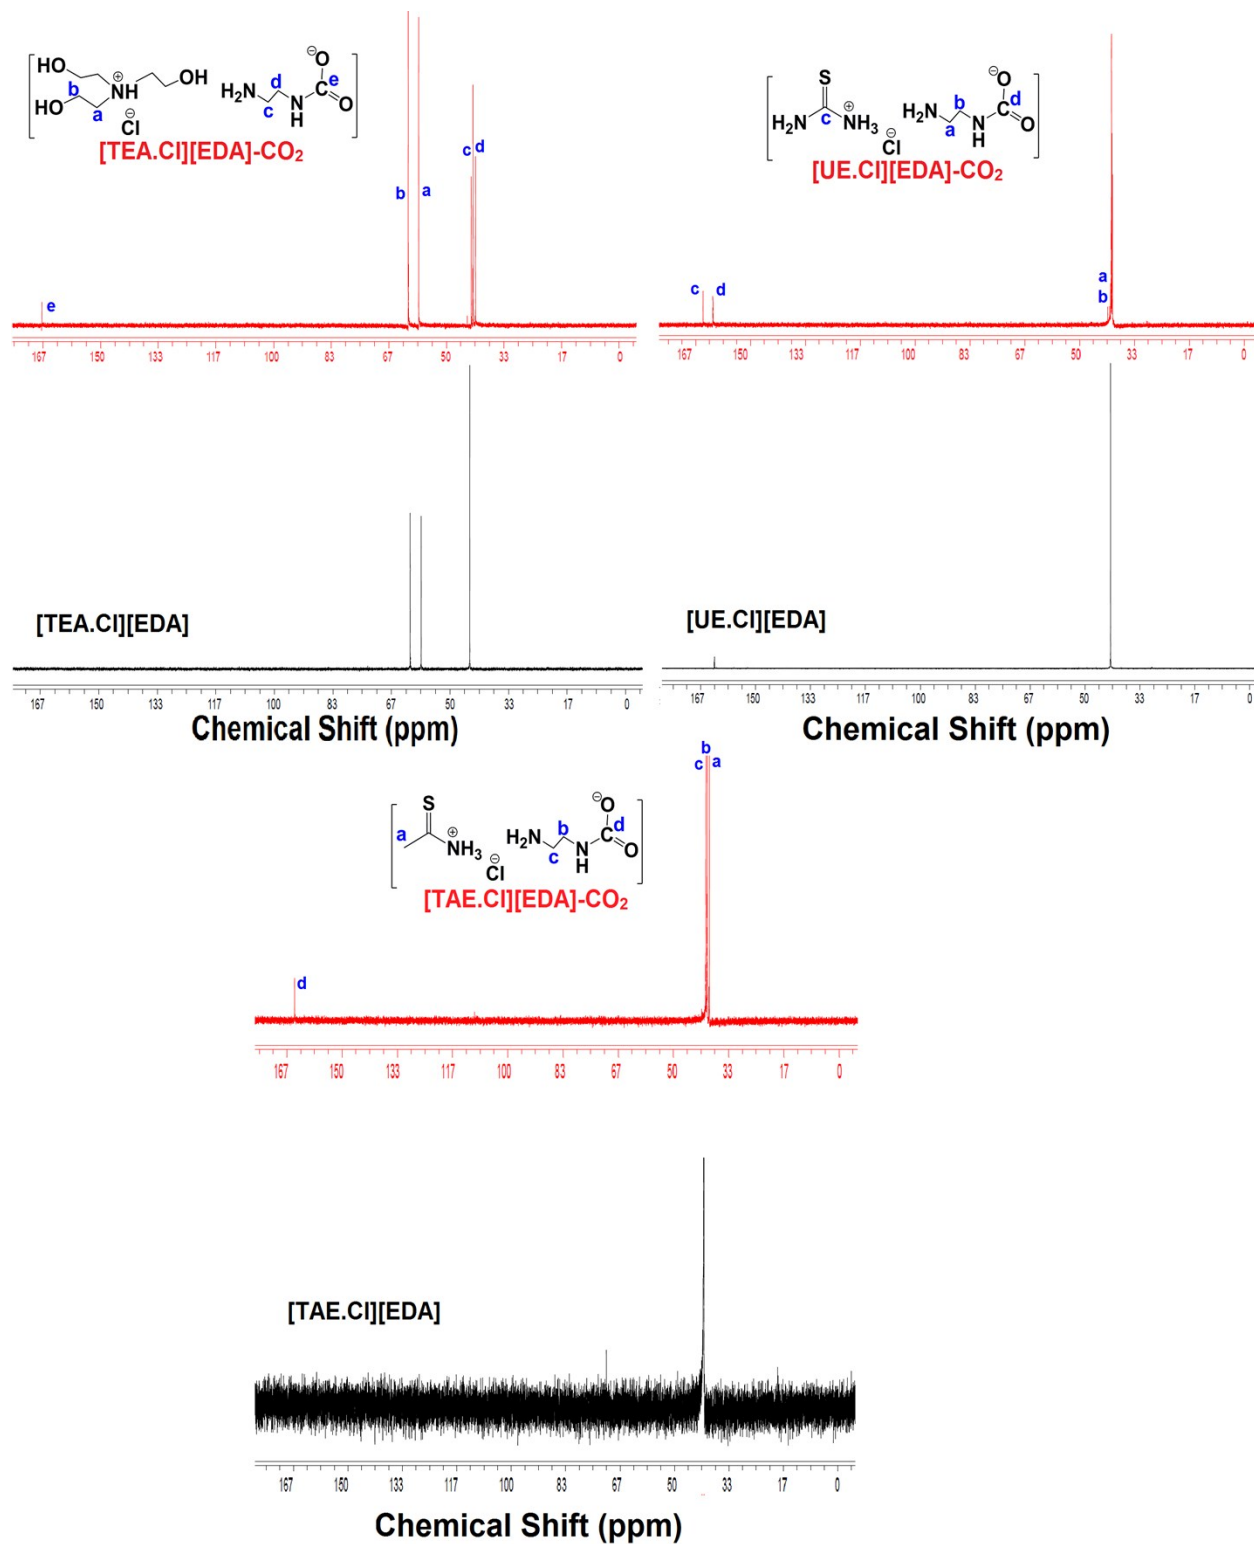

**Fig. S1**  $^{13}\text{C}$  NMR analyses of various DESs with a molar composition of HBA: HBD=1:3 before (black) and after (red)  $\text{CO}_2$  absorption.

### a) Hydrochloride Salts

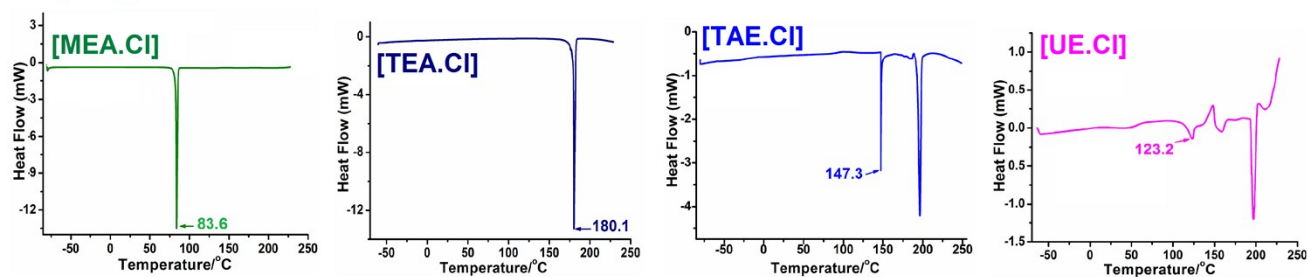

### b) [MEA.Cl][EDA] with different ratios

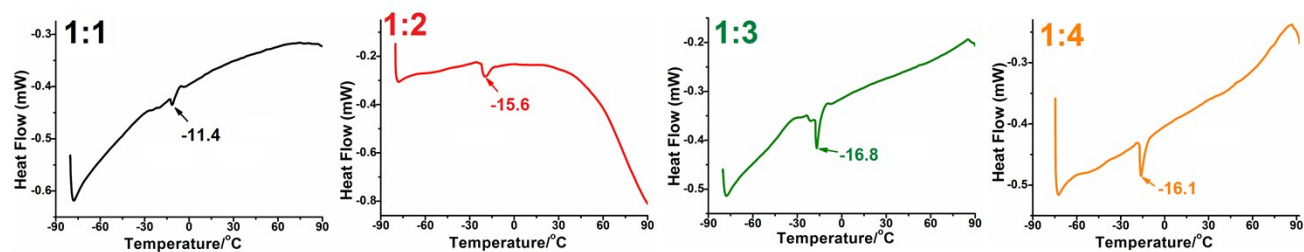

### c) DESs with HBA:HBD=1:3

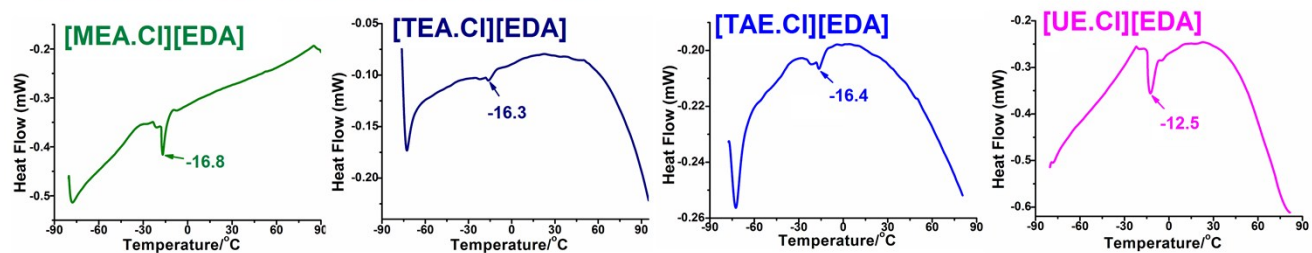

**Fig. S2** DSC spectra of (a) Hydrochloride salts; and prepared DESs, (b) [MEA.Cl][EDA] with different molar ratios, and (c) other DESs with HBA:HBD=1:3.



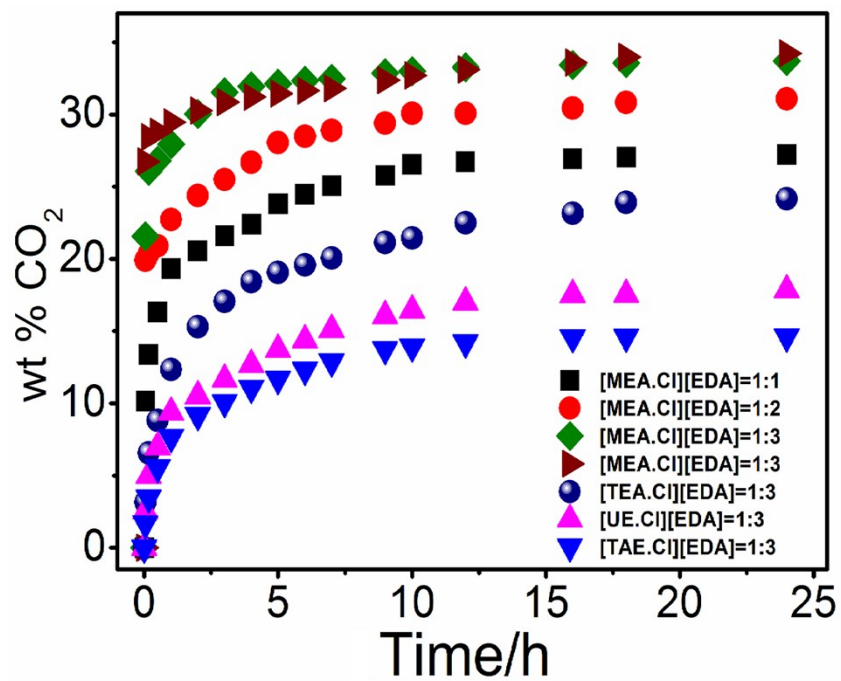

**Fig. S3** Time dependent CO<sub>2</sub> absorption capacities of prepared deep eutectic solvents (DESs) at 30°C and atmospheric pressure.

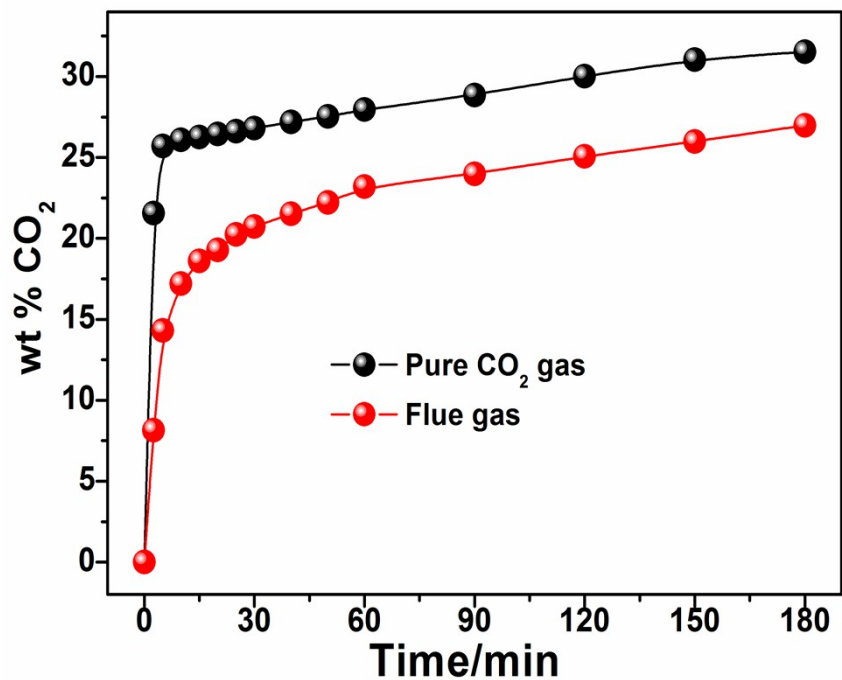

**Fig. S4** Comparative CO<sub>2</sub> uptake capacity of [MEA.Cl][EDA]=1:3 with pure CO<sub>2</sub> gas and mixture flue gas (15 wt% CO<sub>2</sub>+85 wt% N<sub>2</sub>) at 30 °C and atmospheric pressure for 3 h.

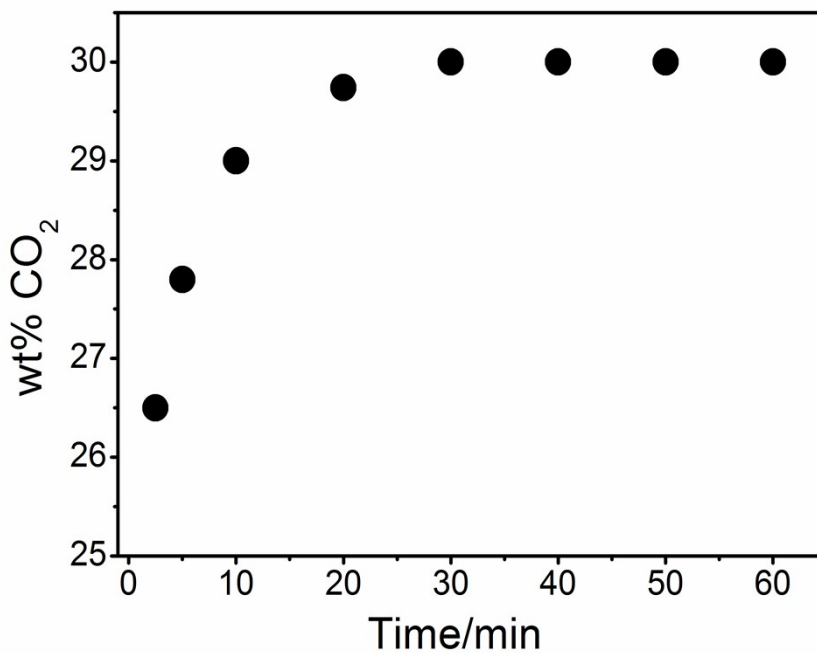

**Fig. S5** CO<sub>2</sub> absorption capacities of pure EDA at 30 °C and atmospheric pressure.

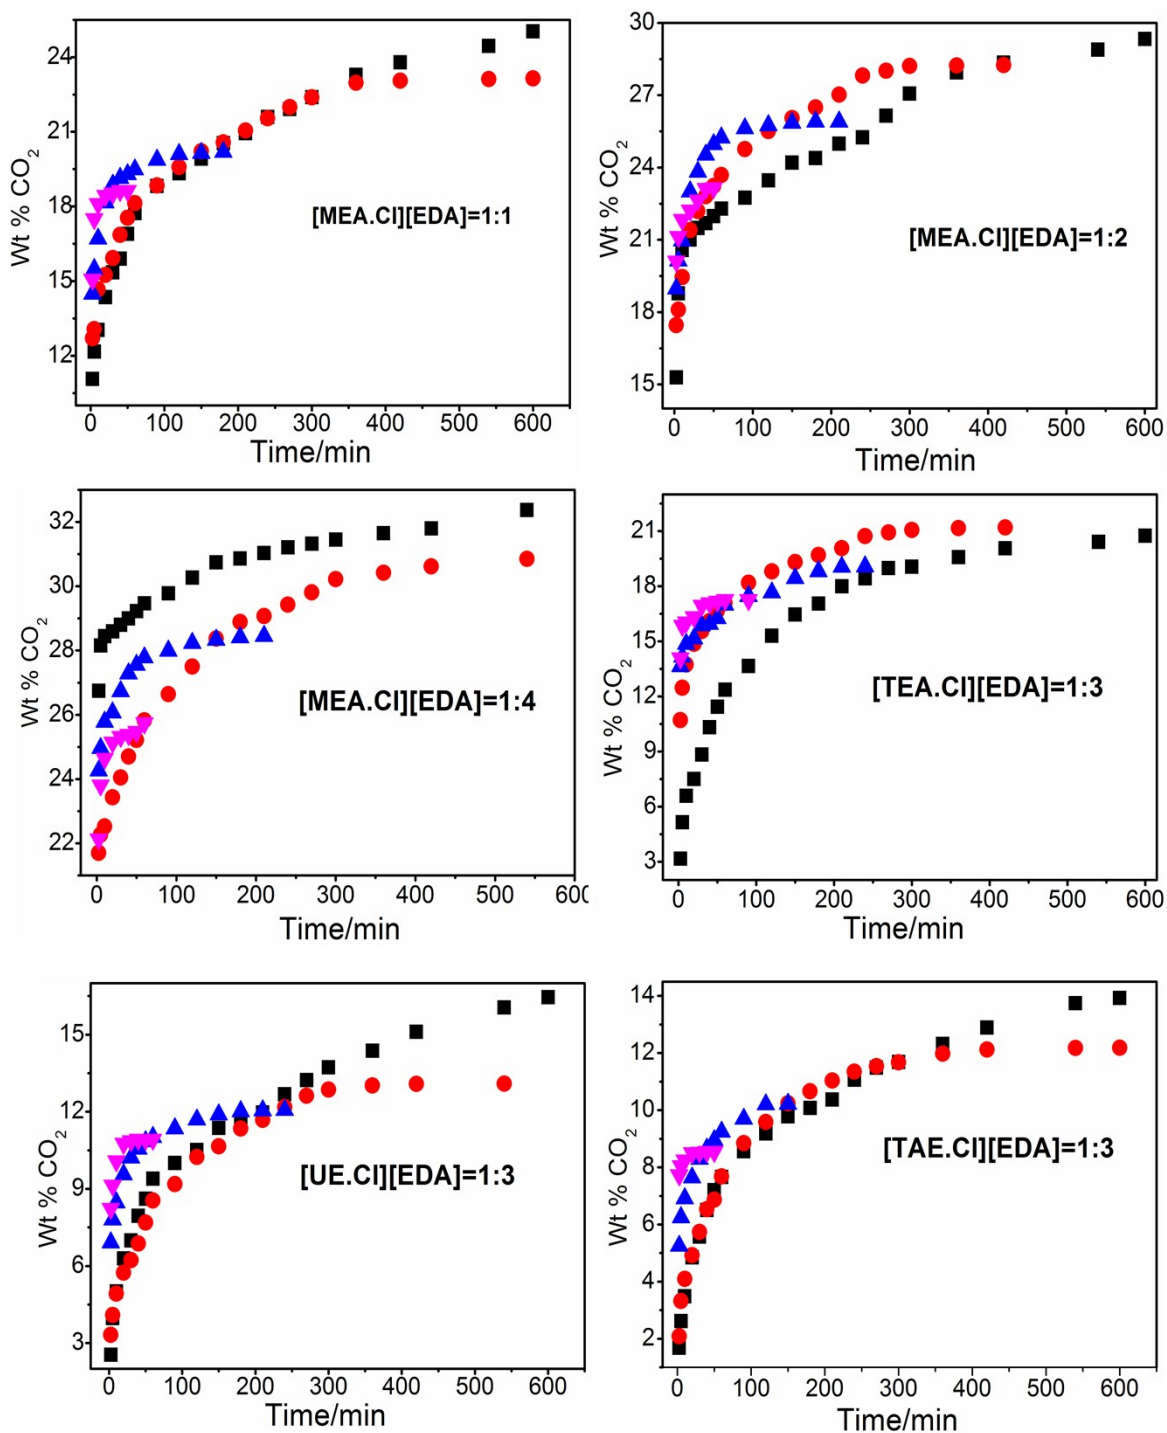

**Fig. S6** Time-dependent CO<sub>2</sub> uptakes of synthesized DESs at different temperatures:

■ = 30 °C, ● = 50 °C, ▲ = 70 °C, ▼ = 90 °C.

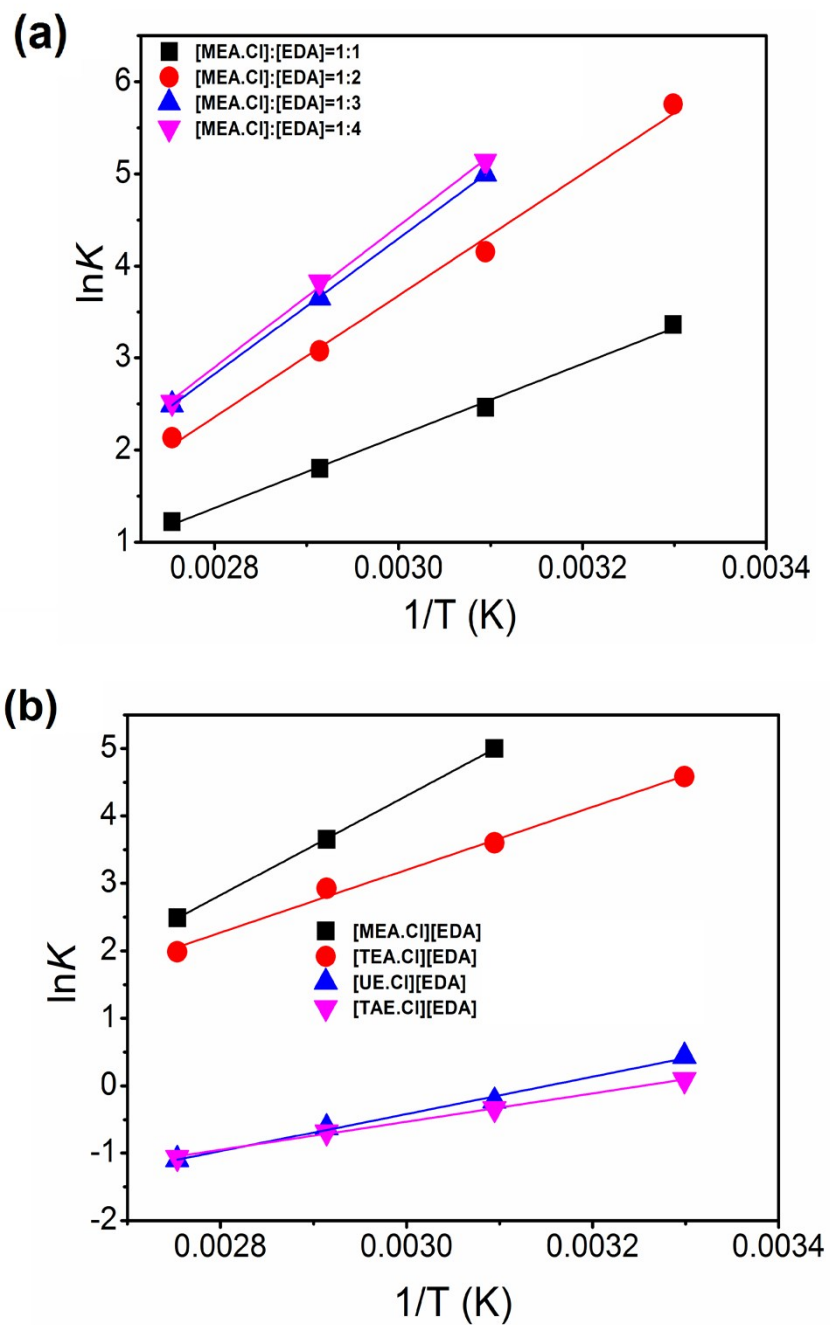

**Fig. S7** Van't Hoff plots ( $\ln(K)$  vs.  $1/T$ ) for  $\text{CO}_2$  absorption reaction. (a) [MEA.Cl][EDA] with different molar compositions. (b) Various DESs with different HBAs with a fixed molar composition of HBA:HBD=1:3.

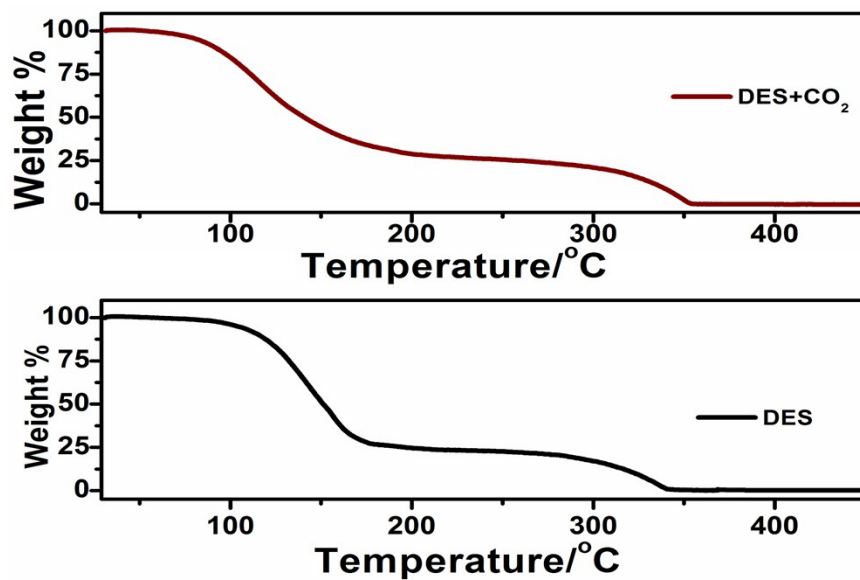

**Fig. S8** TGA profiles for [MEA.Cl][EDA]=1:3 for the bare and CO<sub>2</sub>-loaded cases: 5 °C min<sup>-1</sup> scan rate.

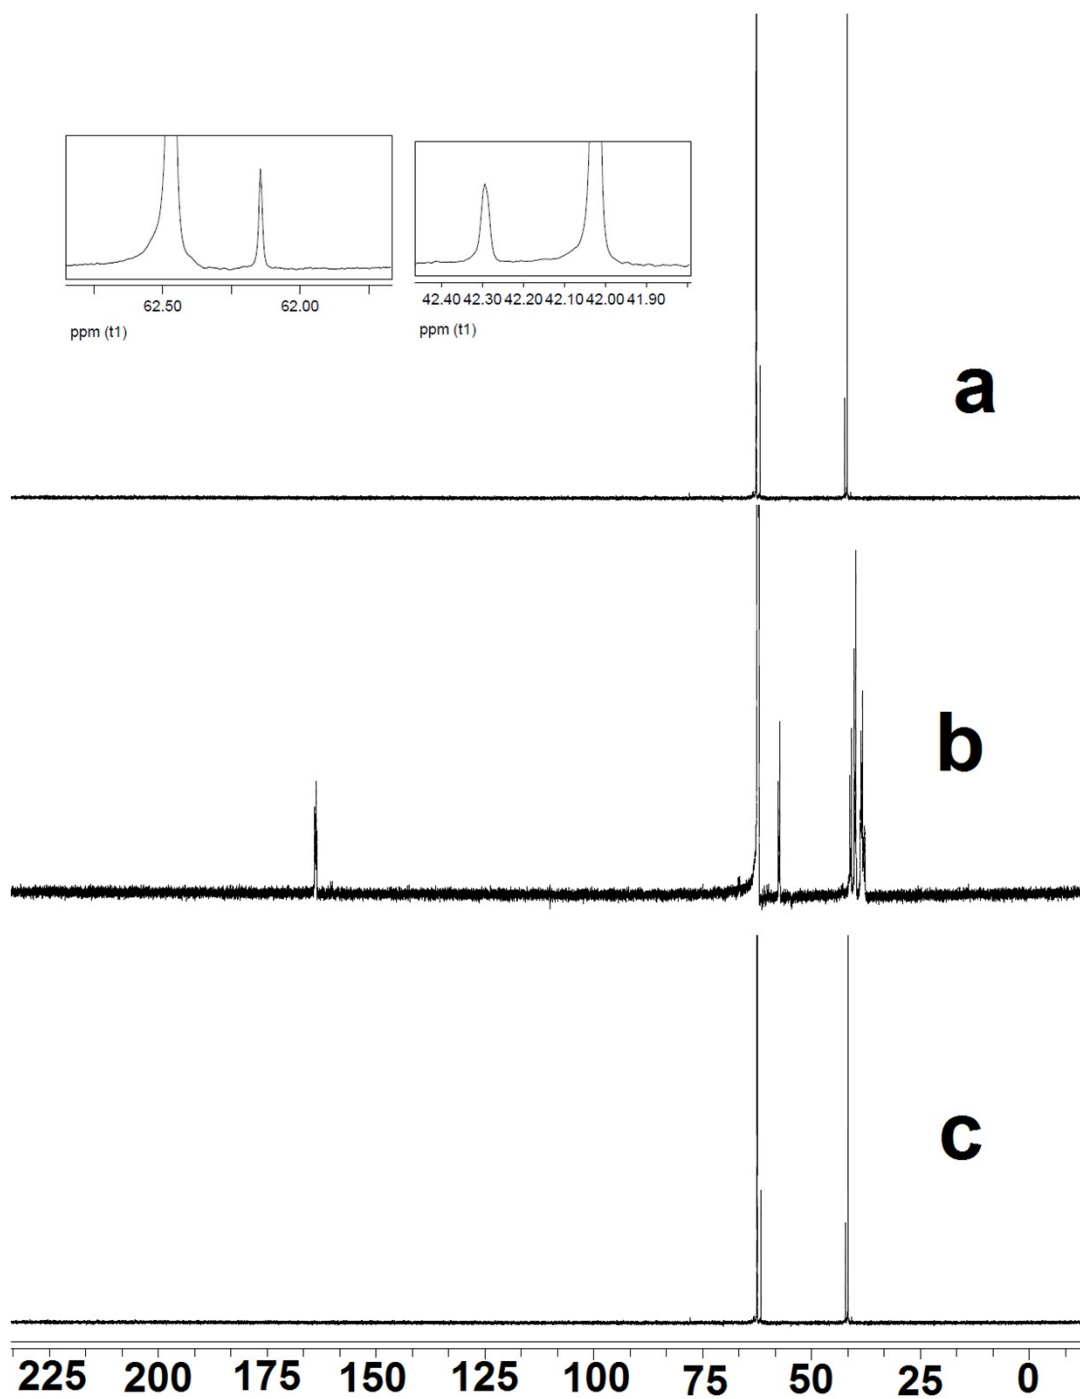

**Fig. S9**  $^{13}\text{C}$  NMR spectra of 30 wt% [MEA.Cl][EDA]=1:3 in ethylene glycol: a) before  $\text{CO}_2$  absorption, b) after  $\text{CO}_2$  absorption in the 5<sup>th</sup> cycle, and c) after  $\text{CO}_2$  desorption in the 5<sup>th</sup> cycle.

**Table S1** CO<sub>2</sub> uptake capacities of representative deep eutectic solvents (DESs) in the literatures and present study

| No  | DESs <sup>a</sup> | Molar weight | Ratio | <i>T</i> (°C) | <i>P</i> (bar) | CO <sub>2</sub> uptake (in mole) <sup>e</sup> | CO <sub>2</sub> uptake (wt%) | Reference    |
|-----|-------------------|--------------|-------|---------------|----------------|-----------------------------------------------|------------------------------|--------------|
| 1.  | [ChCl:U]          | 82.79        | 1:2.5 | 40            | 11.5           | 0.046                                         | 2.35                         | 25           |
| 2.  | [ChCl:U]          | 86.58        | 1:2   | 40            | 57.8           | 0.036                                         | 2.00                         | 26           |
| 3.  | [ChCl:EG]         | 87.92        | 1:2   | 40            | 61.6           | 0.022                                         | 1.67                         | 27           |
| 4.  | [ChCl:Gly]        | 107.93       | 1:2   | 30            | 58.6           | 0.037                                         | 1.87                         | 28           |
| 5.  | [ChCl:LA]         | 93.18        | 1:15  | 30            | 35.9           | 0.099                                         | 1.85                         | 29           |
| 6.  | [ChCl:TEG]        | 148.06       | 1:4   | 25            | 10             | 0.042                                         | 1.30                         | 31           |
| 7.  | [ChCl:U]          | 75.97        | 1:4   | 25            | 10             | 0.024                                         | 1.14                         | "            |
| 8.  | [ChCl:EG]         | 70.68        | 1:8   | 25            | 10             | 0.026                                         | 1.43                         | "            |
| 9.  | [ChCl:Gly]        | 103.97       | 1:3   | 25            | 10             | 0.045                                         | 2.01                         | "            |
| 10. | [ChCl:EA]         | 72.30        | 1:6   | 25            | 10             | 0.109                                         | 7.40                         | "            |
| 11. | [ChCl:DEA]        | 110.06       | 1:6   | 25            | 10             | 0.093                                         | 4.08                         | "            |
| 12. | [TBA.Br:EA]       | 98.41        | 1:6   | 25            | 10             | 0.116                                         | 5.91                         | "            |
| 13. | [TBABr:DEA]       | 136.18       | 1:6   | 25            | 10             | 0.104                                         | 3.73                         | "            |
| 14. | [TBABr:TEA]       | 192.49       | 1:3   | 25            | 10             | 0.083                                         | 2.07                         | "            |
| 15. | [BTTPCl:Gly]      | 114.92       | 1:12  | 25            | 10             | 0.051                                         | 2.06                         | "            |
| 16. | [BTTPBr: EA]      | 115.73       | 1:12  | 25            | 10             | 0.051                                         | 2.01                         | "            |
| 17. | [MTPPBr: EA]      | 103.38       | 1:6   | 25            | 10             | 0.144                                         | 7.14                         | "            |
| 18. | [MEA.Cl:EDA]      | 69.46        | 1:3   | 30            | 1              | 0.502 <sup>b</sup>                            | 31.5 <sup>b</sup>            | Present work |
| 19. | [MEA.Cl:EDA]      | 69.46        | 1:3   | 30            | 1              | 0.536 <sup>c</sup>                            | 33.7 <sup>c</sup>            | Present work |
| 20. | [MEA.Cl:EDA]      | 69.46        | 1:3   | 30            | 1              | 0.454 <sup>d</sup>                            | 28.8 <sup>d</sup>            | Present work |
| 21. | [TEA.Cl:EDA]      | 91.49        | 1:3   | 30            | 1              | 0.354 <sup>b</sup>                            | 17.5 <sup>b</sup>            | Present work |
| 22. | [UE.Cl:EDA]       | 69.20        | 1:3   | 30            | 1              | 0.184 <sup>b</sup>                            | 11.7 <sup>b</sup>            | Present work |
| 23. | [TAE.Cl:EDA]      | 72.97        | 1:3   | 30            | 1              | 0.168 <sup>b</sup>                            | 10.1 <sup>b</sup>            | Present work |

<sup>a</sup>[ChCl:U]-Choline chloride:urea; [ChCl:EG]- Choline chloride: ethylene glycol; [ChCl:Gly]- Choline chloride: Glycerol; [ChCl:TEG]- Choline chloride:triethylene glycol; [ChCl:LA]- Choline chloride: lactic acid; [ChCl:MEA]- Choline Chloride: Monoethanolamine; [ChCl:DEA]- Choline chloride: Diethanolamine; [TBA.Br:EA]-Tetra butyl ammonium bromide: ethanolamine; [TBABr:DEA]- Tetra butyl ammonium bromide:Diethanolamine; [TBABr:TEA]- Tetra butyl ammonium bromide:Triethanolamine; [BTTPCl:Gly]-Benzyltriphenylphosphonium chloride: glycerol; [BTTPBr: EA]-n-butyltriphenylphosphonium bromide: Ethanolamine; [MTPPBr: EA]-Methytriphenylphosphonium bromide: Ethanolamine.

<sup>b</sup>CO<sub>2</sub> uptake after 3 h.

<sup>c</sup>CO<sub>2</sub> uptake after 24 h.

<sup>d</sup>CO<sub>2</sub> uptake after 1 h with 10% water.

<sup>e</sup>mol CO<sub>2</sub>/mol solvent

## Reference

1. J. Ren, L. B. Wu and B. G. Li, *Ind. Eng. Chem. Res.*, 2013, **52**, 8565-8570.
2. X. Y. Luo, F. Ding, W. J. Lin, Y. Q. Qi, H. R. Li and C. M. Wang, *J. Phys. Chem. Lett.*, 2014, **5**, 381-386.
3. Y. Xiang, M. C. Yan, Y. S. Choi, D. Young and S. Nesic, *Int. J. Greenh. Gas. Con.*, 2014, **30**, 125-132.
4. A. Veawab and A. Aroonwilas, *Corros. Sci.*, 2002, **44**, 967-987.
